# Supplementary material
Source: publisher figshare collection journal article supplement (https://acs.figshare.com/ndownloader/files/25361250)
Supplement: Supplementary file 1 [file 25361250]

## Supporting Information

### High Performance van der Waals Junction Field Effect Transistors Utilizing Organic Molecule/Transition Metal Dichalcogenide Interface

*Hyung Gon Shin<sup>‡</sup>, Donghee Kang<sup>‡</sup>, Yeonsu Jeong, Kitae Kim, Yongjae Cho,*

*Jeehong Park, Sungjae Hong, Yeonjin Yi\*, Seongil Im\**

van der Waals Materials Research Center, Department of Physics, Yonsei

University, 50 Yonsei-ro, Seodaemun-gu, Seoul 03722, Republic of Korea.

\*Corresponding author. e-mail: yeonjin@yonsei.ac.kr (Y. Y.), semicon@yonsei.ac.kr

(S. I.)

KEYWORDS: van der Waals junction, TMDs, Alq<sub>3</sub>, NPB, junction field effect

transistor



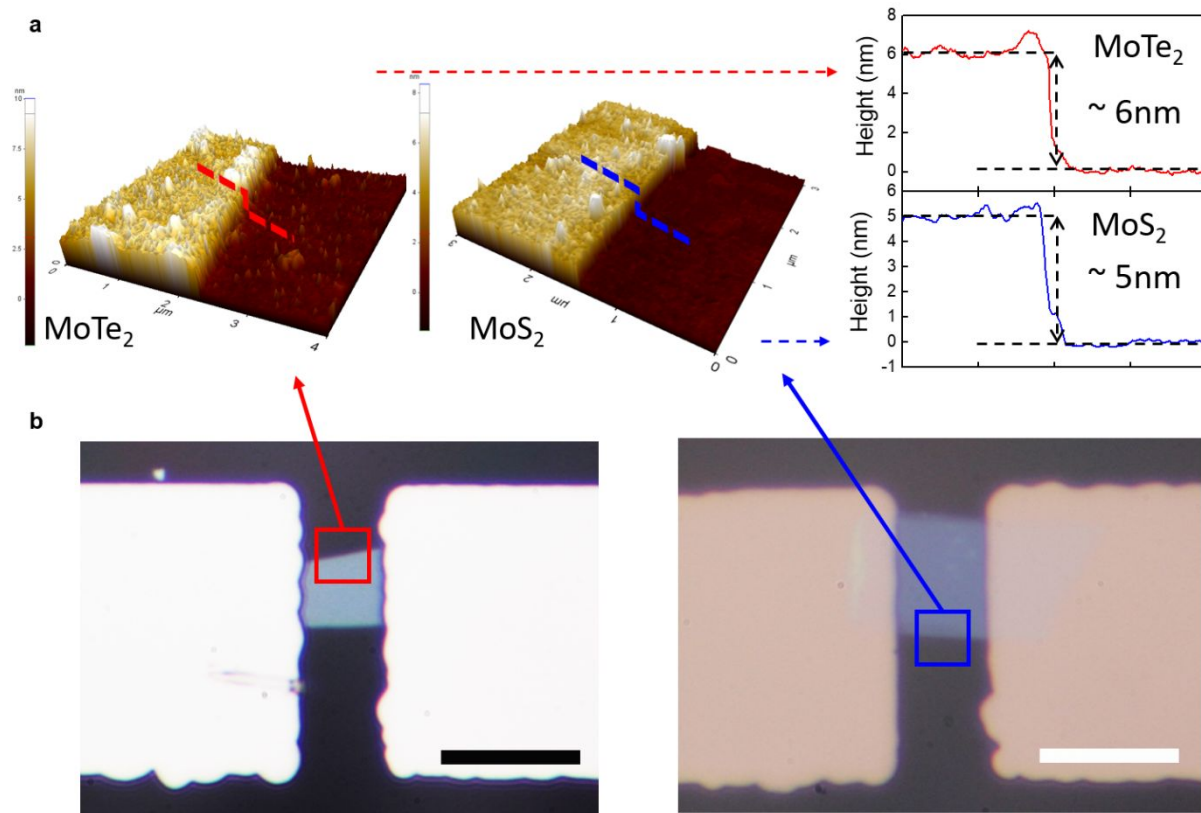

**Figure S1.** AFM measurement. (a) 3D AFM images and Thickness profiles for MoTe<sub>2</sub> and MoS<sub>2</sub> flakes. Thickness appears to be ~6 and ~5 nm for MoTe<sub>2</sub> and MoS<sub>2</sub> flakes, respectively. (b) Corresponding optical microscope images of *p*- and *n*- JFET before patterning the gate. (scale bar, 10 μm)

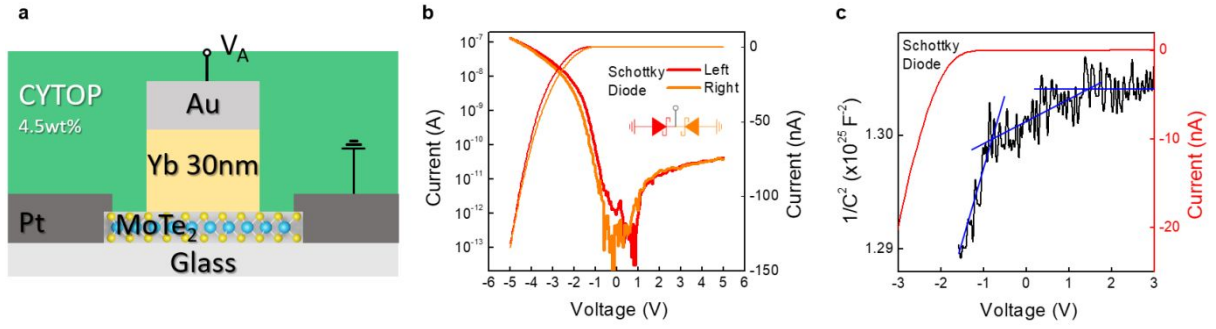

**Figure S2.** I-V & C-V measurement of Yb/*p*-MoTe<sub>2</sub> Schottky diode. (a) Schematic cross section view of our Yb/MoTe<sub>2</sub> Schottky junction MESFET. (b) I-V curves of the Yb/MoTe<sub>2</sub> Schottky diode that was presented in Figure 1f of main manuscript. In the logarithmic scale I-V plots, turn-on voltage seems to be -1 ~ -2 V. (c) C-V measurement of Yb/*p*-MoTe<sub>2</sub> Schottky diode was conducted and plotted along with I-V curve. According to the I-V and C-V curves, *p*-type only region starts from -1 V. On the one hand, carrier concentration of holes in MoTe<sub>2</sub> is again extracted out, to be  $\sim 7 \times 10^{16} \text{ cm}^{-3}$ , using the slope at 500 kHz for C-V measurements. So the hole density is only slightly different from the case at 400 kHz, which is but regarded ignorable.

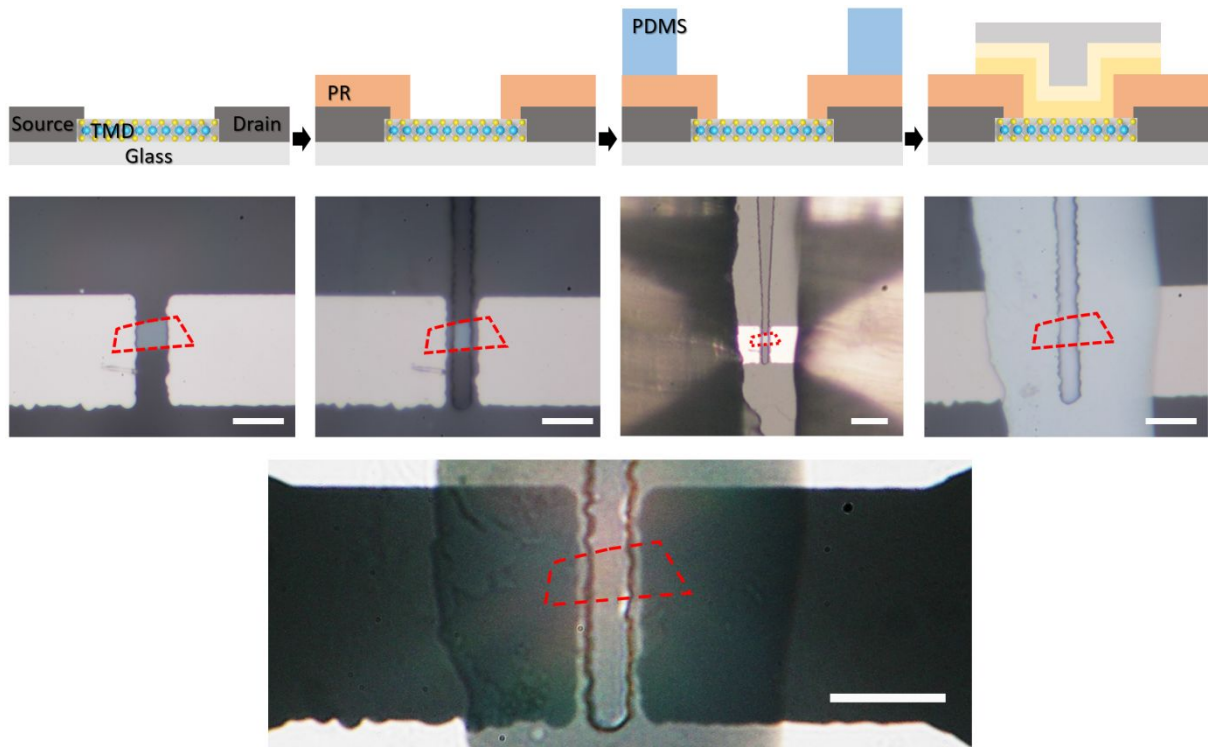

**Figure S3.** Fabrication process of organic/TMD JFET. 1. The initially transferred TMD is patterned with S/D electrode on glass by conventional photolithography and lift-off. 2. Photoresist (PR) is patterned on the device as shown above, to protect ungated MoTe<sub>2</sub> region from any gate metal, and in fact the PR has dipoles inside causing MoTe<sub>2</sub> channel to be more strong *p*-type in polarity. 3. Then, we used a thick PDMS to pattern the gate area looking through an optical microscope. 4. Thermal evaporation deposition of organic and gate metal was conducted sequentially. 5. Finally, PDMS has been removed to show a wanted device architecture. Final OM image was obtained by bottom illumination, clearly displaying a whole JFET area. Flake is too thin (5~6 nm) to clearly distinguish its contour. The size of inset scale bar is 10, 10, 20, 10 and 10  $\mu\text{m}$  respectively in order from the left OM image.

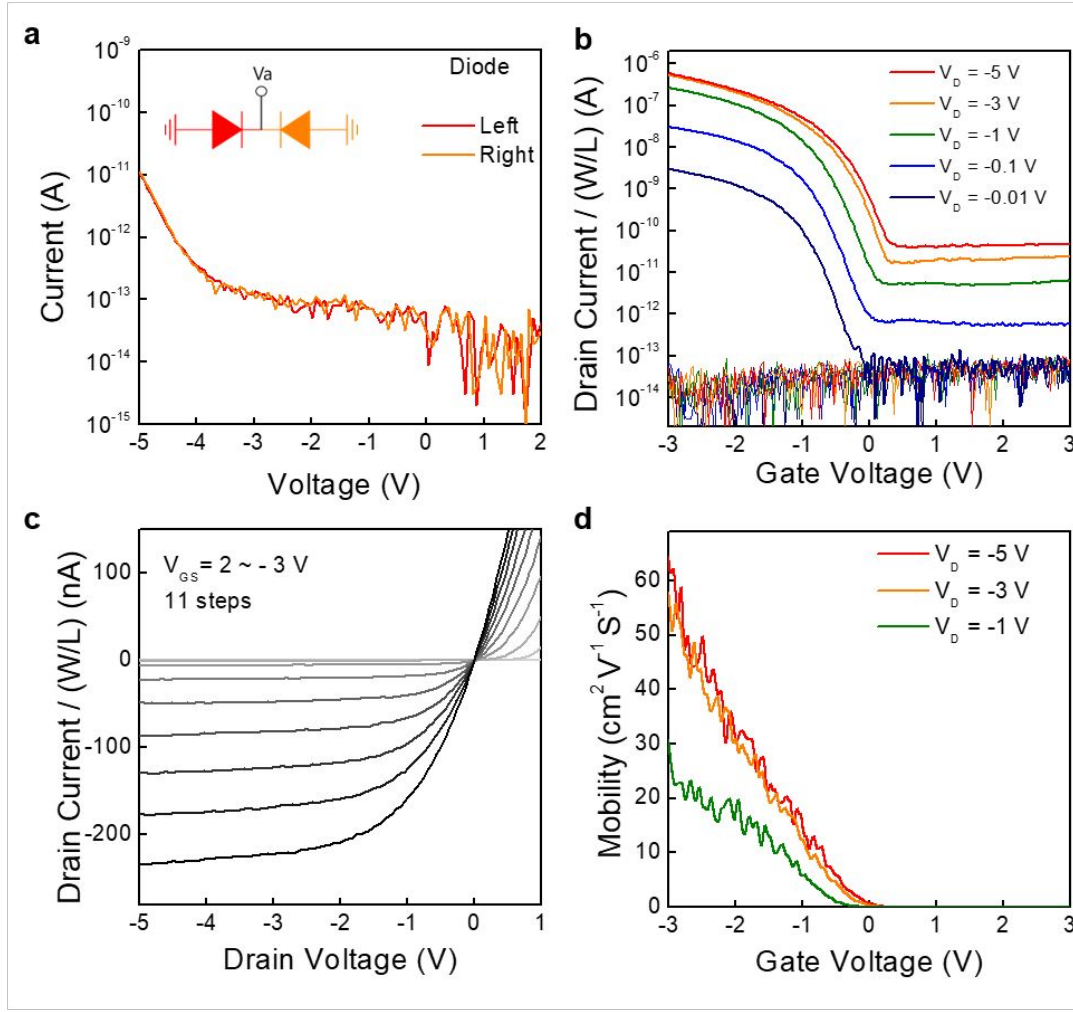

**Figure S4.** van der Waals *n*-organic/*p*-channel MoTe<sub>2</sub> junction FET with LiF/Alq<sub>3</sub> gate as fabricated for reproducibility test. (a) *I*-*V* curves of Alq<sub>3</sub>/*p*-MoTe<sub>2</sub> PN diode. (b) *I<sub>D</sub>*-*V<sub>GS</sub>* transfer, *I<sub>G</sub>*-*V<sub>GS</sub>* gate leakage, (c) *I<sub>D</sub>*-*V<sub>DS</sub>* output curves and (d) mobility plot of another *p*-JFET with same structure as the JFET in Figure 2 of main manuscript. Highest mobility and *I<sub>ON</sub>* value appear to be ~60 cm<sup>2</sup>/V s and 240 nA, respectively which are somewhat lower than those of the other JFET presented in Figure 2. It is probably because the MoTe<sub>2</sub> thickness might be here thinner than the other case, however, 60 cm<sup>2</sup>/V s is still regarded quite high.

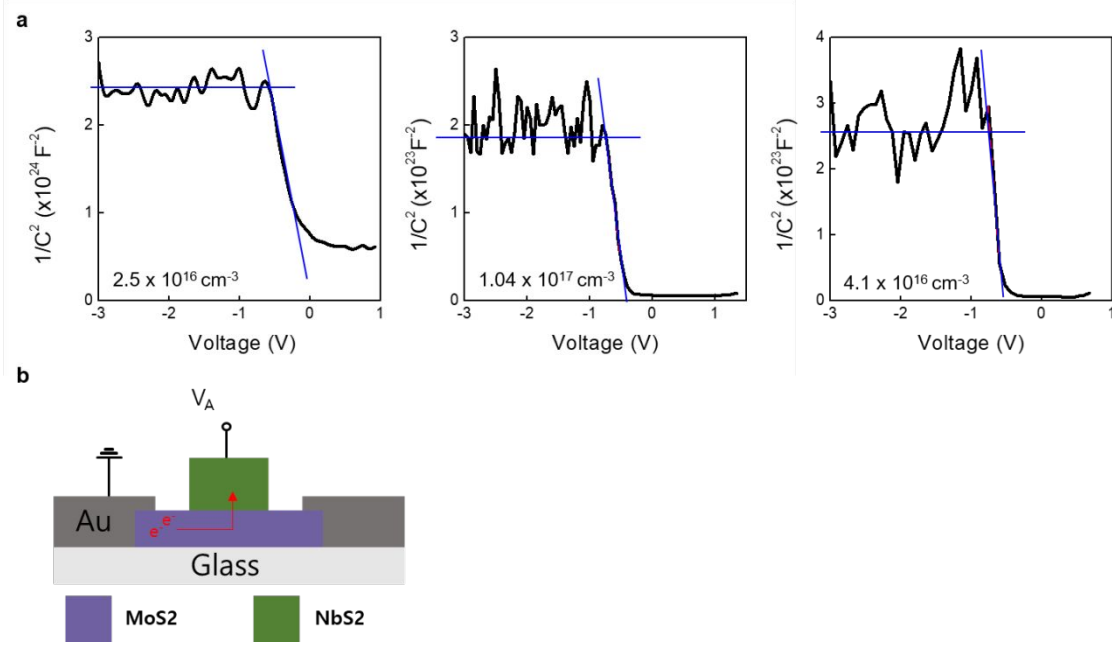

**Figure S5.** C-V measurement of NbS<sub>2</sub>/n-MoS<sub>2</sub> Schottky diodes for estimating electron concentration. (a) C-V measurement results from NbS<sub>2</sub>/n-MoS<sub>2</sub> Schottky Diode. (b) Schematic cross section of *n*-channel MESFET with two Schottky diodes.

In order to estimate the carrier density of *n*-MoS<sub>2</sub>, we fabricated a NbS<sub>2</sub>/n-MoS<sub>2</sub> MESFET, which contains two Schottky diodes in one MESFET device, although such experimentations are already found in our previous report.<sup>1</sup> Schematically shown above is the device. After C-V measurement, the C-V data was converted to  $1/C^2$ -V plot. The slope of  $1/C^2$ -V plot is  $-2/(q\epsilon_s N_d)$  according to the charge equation involving the bias-dependent depletion thickness ( $X_d$ ). Here,  $q$  is electronic charge,  $\epsilon_s$  is dielectric constant of MoS<sub>2</sub> =  $12\epsilon_0$ ,  $N_d$  is electron concentration # /cm<sup>3</sup>. As we work out electron carrier concentration,  $N_d$  of 5 nm-thin MoS<sub>2</sub> channel, from  $1/C^2$ -V measurement on the diode. Schottky diode would show an abrupt capacitance change right at the moment when the MoS<sub>2</sub> layer thickness under NbS<sub>2</sub> gets to the total depletion state by a certain gate voltage, as shown in the figure. As a result, the slope of  $1/C^2$ -V plot is extracted out to estimate  $N_d$  value, which turns out to be  $2.5 \times 10^{16}$ ,  $4.1 \times 10^{16}$ , and  $1.04 \times 10^{17} \text{ cm}^{-3}$  as obtained from three NbS<sub>2</sub>/n-MoS<sub>2</sub> Schottky diodes. We thus averaged the three values, and determine  $N_d$  as  $5.67 \times 10^{16} \text{ cm}^{-3}$ .

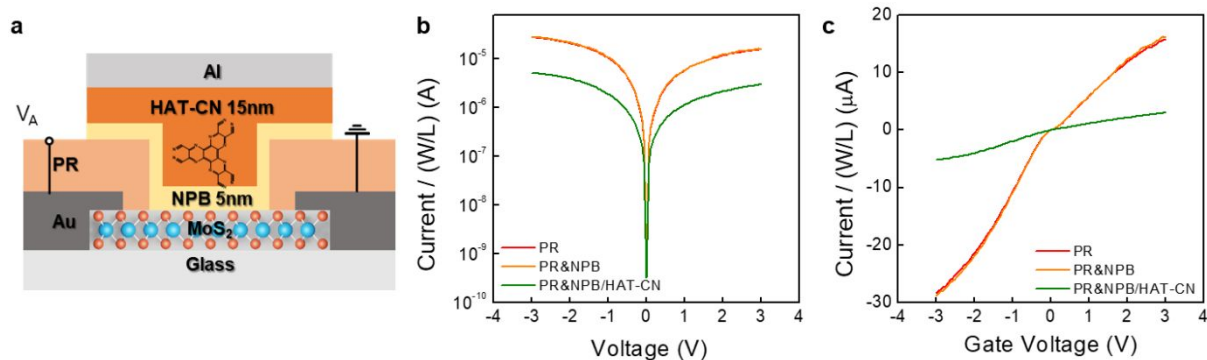

**Figure S6.** Two terminal I-V measurements for MoS<sub>2</sub> JFET system. (a) Schematic cross section view of our HAT-CN/NPB/MoS<sub>2</sub> JFET. (b) Logarithmic and (c) Linear scale two terminal current-voltage (I-V) measurements of MoS<sub>2</sub> channel in Al/HAT-CN/NPB/MoS<sub>2</sub> JFET. With NPB deposition only, the current is almost the same as that without NPB. With HAT-CN/NPB deposition, the current decreases by an order of magnitude due to HAT-CN/NPB-induced channel depletion. So these results well support our band diagrams in the main manuscript.



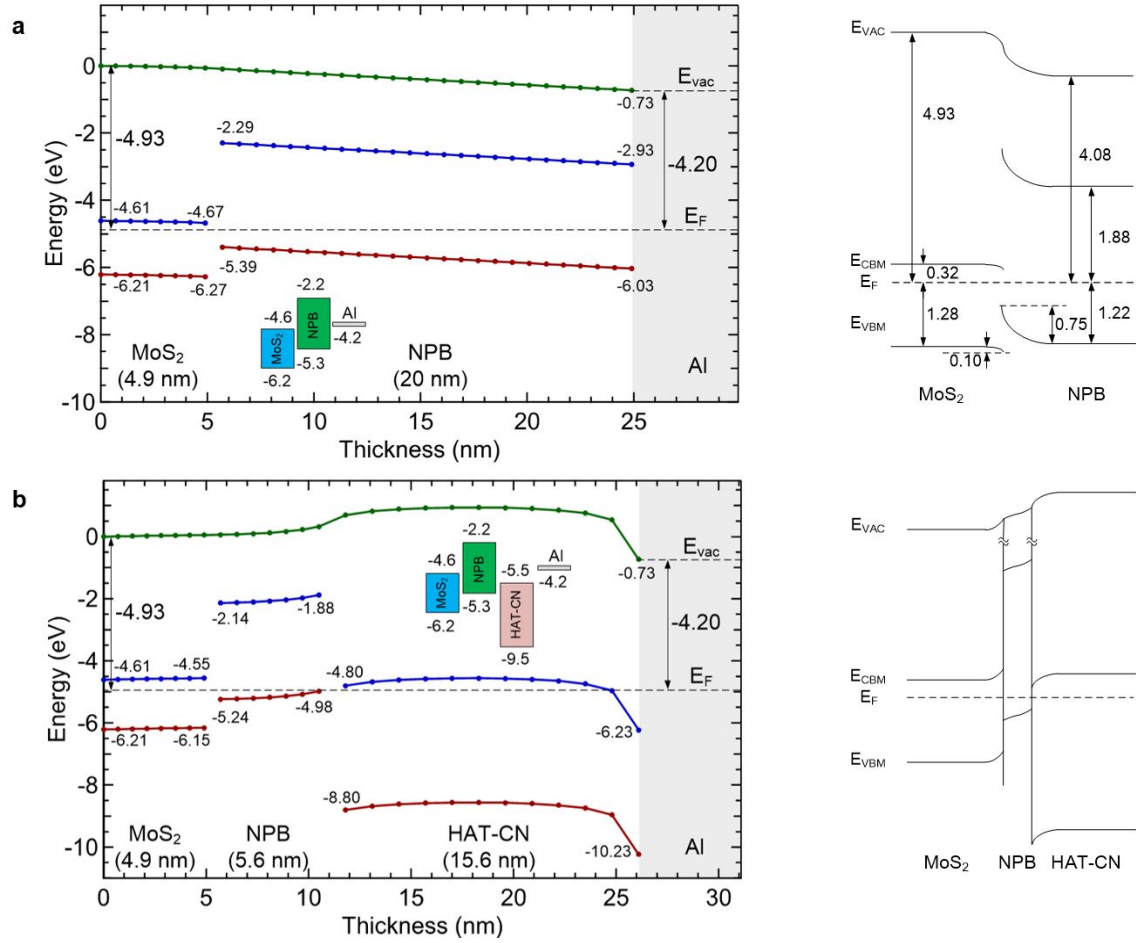

**Figure S7.** Band diagram simulation for Al/NPB/MoS<sub>2</sub> and Al/HAT-CN/NPB/MoS<sub>2</sub> systems.

(a) Al/NPB/MoS<sub>2</sub> band diagram estimated by simulation that contains Poisson's equations. Results show the charge accumulation (bulk conduction edge  $E_C$  vs. junction  $E_C = -4.61$ :  $-4.67$  eV) at the MoS<sub>2</sub> junction with NPB, which well matches to the expected band diagram in the main manuscript (right). (b) Al/HAT-CN/NPB/MoS<sub>2</sub> band diagram estimated by simulation that contains Poisson's equations. Results show the charge depletion (bulk conduction edge  $E_C$  vs. junction  $E_C = -4.61$ :  $-4.55$  eV) at the MoS<sub>2</sub> junction with NPB due to HAT-CN, which well matches to the expected band diagram in the main manuscript (right).

This numerical electrostatic simulation<sup>2</sup> contains a self-consistent procedure to figure out the actual charge distribution inside the system domain and corresponding electric potential which brings a band bending. For all cases, we assume MoS<sub>2</sub> thickness as  $\sim 4.9$  nm (7L).

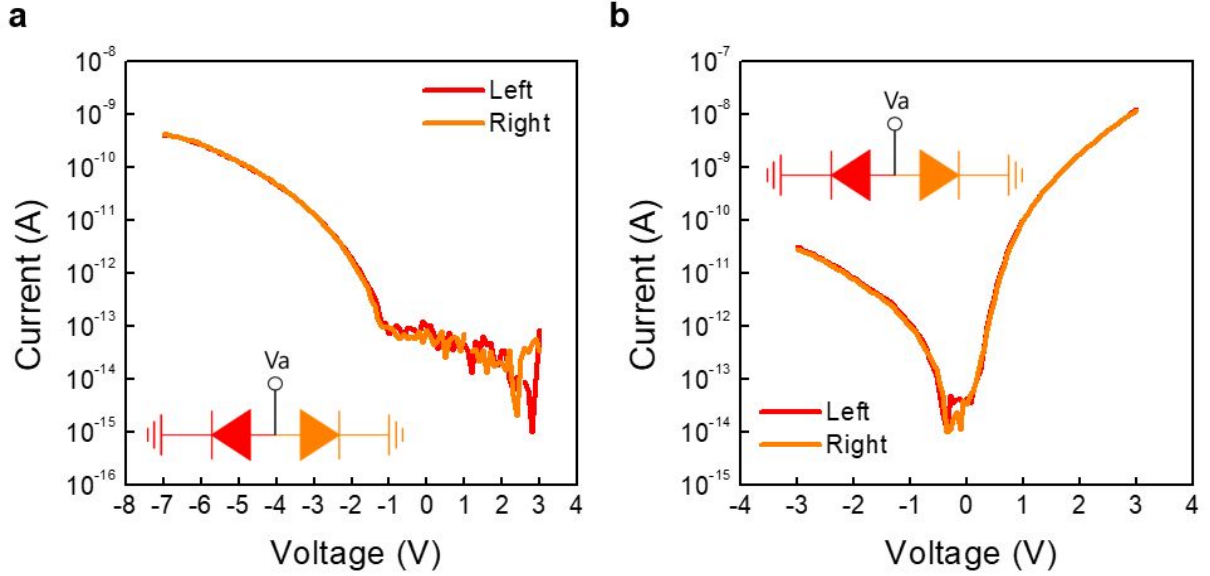

**Figure S8.** I-V characteristics of Al/p-NPB/n-MoS<sub>2</sub> and Al/HAT-CN/p-NPB/n-MoS<sub>2</sub> diodes. (a) I-V characteristics of Al/p-NPB/n-MoS<sub>2</sub> and (b) Al/HAT-CN/p-NPB/n-MoS<sub>2</sub> diodes were measured. Here, Al side is biased with respect to n-MoS<sub>2</sub> (ground). Basically the current level is low in both cases, but behaves different each other. It is because the second case (b) has thin NPB (~ 5 nm) below thick HAT-CN. NPB is thin enough to allow electron tunneling from n-type HAT-CN, causing current increase at (+) bias voltages. (See Figure S7 band diagrams). These vertical PN junction I-V behavior must be similar to those of I<sub>G</sub> leakage in each case, which is understandable.

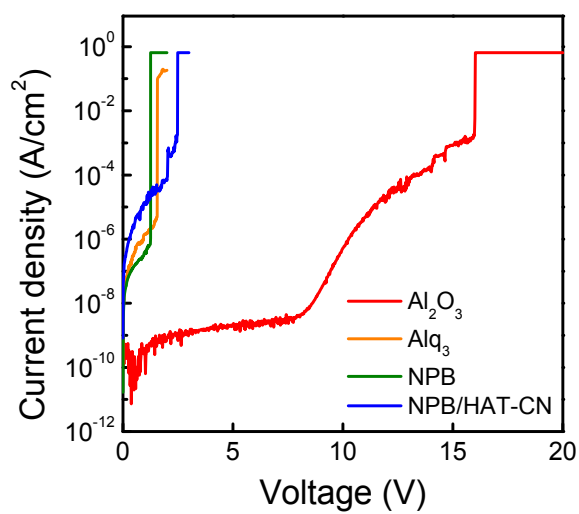

**Figure S9.** I-V characteristics of organic semiconductor gate layers and reference  $\text{Al}_2\text{O}_3$  insulator: Au/ 20 nm-thick NPB (or Alq<sub>3</sub>, NPB/HAT-CN) /Al (metal/organic/metal) diodes and Au/20 nm-thick  $\text{Al}_2\text{O}_3$ /Al diode.

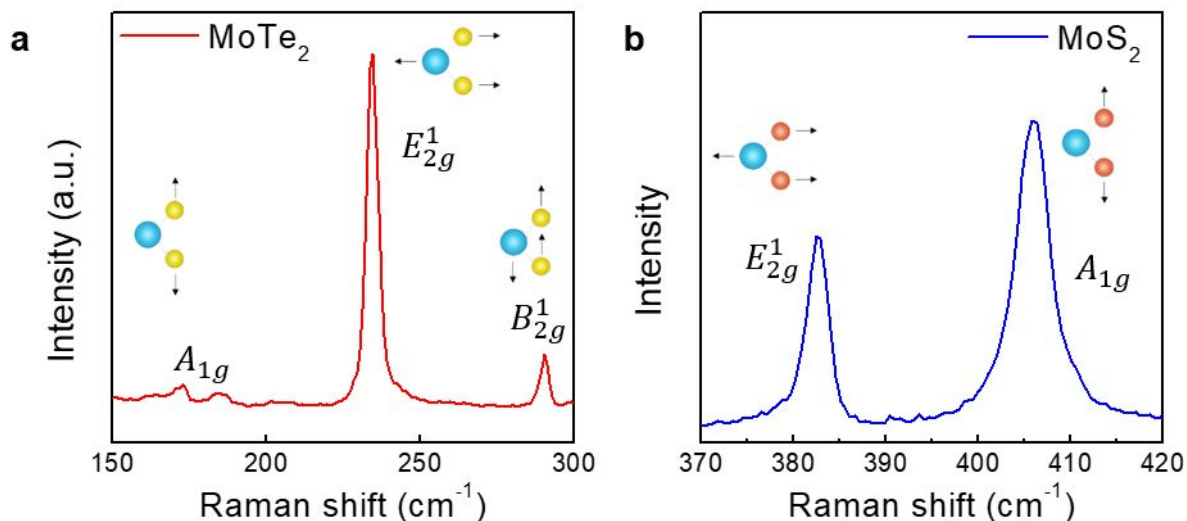

**Figure S10.** Raman results. Raman spectra obtained from (a) MoTe<sub>2</sub> and (b) MoS<sub>2</sub> flakes, which were exfoliated on glass. The spectra appear quite typical for 5-6 nm-thin MoTe<sub>2</sub> and MoS<sub>2</sub>.

## References

- (1) Shin, H. G.; Yoon, H. S.; Kim, J. S.; Kim, M.; Lim, J. Y.; Yu, S.; Park, J. H.; Yi, Y.; Kim, T.; Jun, S. C.; Im, S. Vertical and in-Plane Current Devices Using NbS<sub>2</sub>/n-MoS<sub>2</sub> van der Waals Schottky Junction and Graphene Contact. *Nano Lett.* **2018**, *18*, 1937–1945.
- (2) Oehzelt, M.; Koch, N.; Heimel, G. Organic Semiconductor Density of States Controls the Energy Level Alignment at Electrode Interfaces. *Nat. Commun.* **2014**, *5*, 4174.
